# Supplementary material for: Tuning optical band gap by electrochemical reduction in TiO2 nanorods for improving photocatalytic activities
Source: Royal Society of Chemistry journal article supplement (doi:10.1039/c6ra25274e), 2017-01-01
Supplement: c6ra25274e1.pdf [file c6ra25274e1.pdf]

## Supporting Information

*Jong-Won Yun<sup>a</sup>, Ki Yeon Ryu<sup>a</sup>, Tri Khoa Nguyen<sup>a</sup>, Farman Ullah<sup>a</sup>, Yun Chang Park<sup>b</sup>, Yong Soo Kim<sup>a\*</sup>*

<sup>a</sup>Department of Physics and Energy harvest Storage Research Center, University of Ulsan, Ulsan 44610, South Korea

<sup>b</sup>Measurement and Analysis Division, National Nanofab Center, Daejeon 34141, South Korea

### Experimental Detail

Table S1. Deposition conditions of TiO<sub>2</sub> seed layer and ultrathin Pt film using RF magnetron sputtering.

|                           |                                               |
|---------------------------|-----------------------------------------------|
| Base pressure             | 5.0×10 <sup>-6</sup> torr                     |
| Working pressure          | 5.6×10 <sup>-3</sup> torr                     |
| Environment gas           | Ar                                            |
| Temperature               | Room temperature                              |
| Substrate rotation        | 20 rpm                                        |
| Target-Substrate distance | 15 cm                                         |
| Target size               | 2 inch                                        |
| Deposition time           | TiO <sub>2</sub> seed : 2.5 min<br>Pt : 2 min |
| RF-power                  | TiO <sub>2</sub> seed : 200 W<br>Pt : 30 W    |

Table S2. Spin-coating conditions for sol-gel TiO<sub>2</sub> seed layer.

|              |                         |
|--------------|-------------------------|
| Speed        | 3000 rpm                |
| Time         | 2 min                   |
| Acceleration | 300 rpm/s               |
| Dry          | 300 °C for 5 min in air |
| Repeat       | 2 time                  |
| Annealing    | 450 °C for 120 min      |

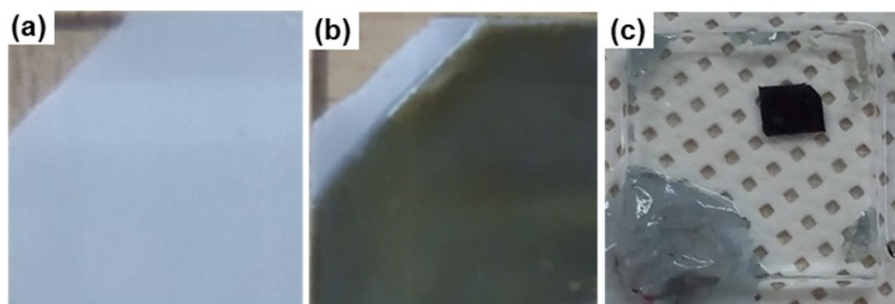

Figure S1. Photographs of (a)  $\text{TiO}_2$  NRs, (b)  $\text{rTiO}_2$  NRs on the RF-sputtered  $\text{TiO}_2$  seed layer and (c) exfoliated  $\text{rTiO}_2$  NRs on the sol-gel  $\text{TiO}_2$  seed layer.

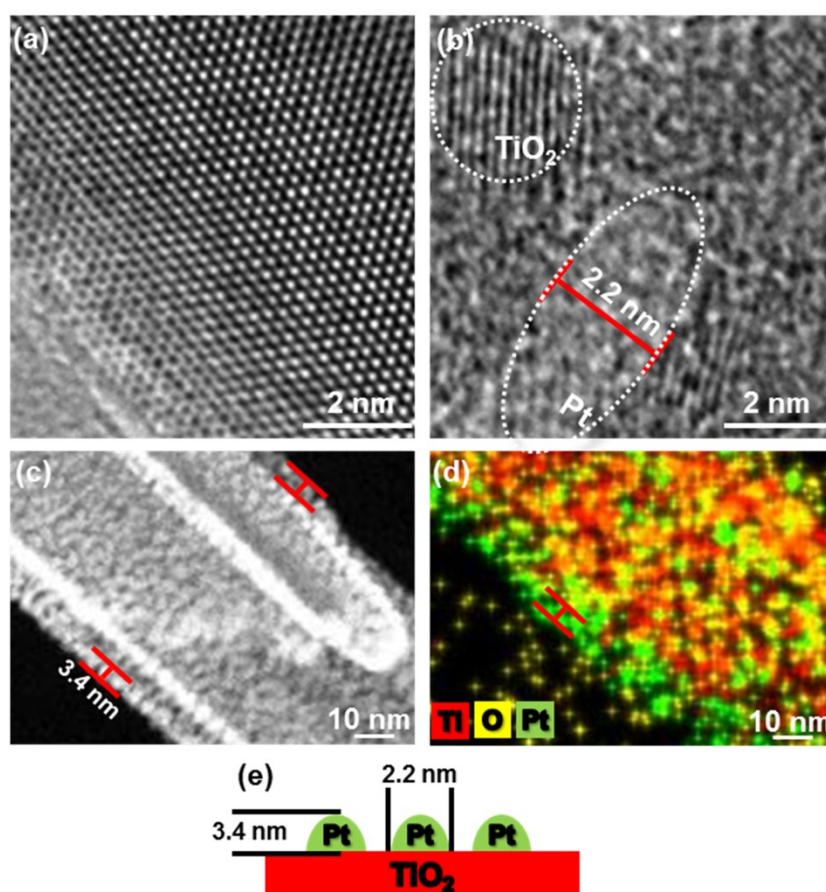

Figure S2. HR-TEM images of (a)  $\text{rTiO}_2$  NRs and (b) Pt decorated  $\text{rTiO}_2$  NRs, indicates RF-sputtered Pt was amorphous. (e) dark field HR-TEM image and (d) HR-TEM EELS element mapping image of Pt decorated  $\text{rTiO}_2$  NRs. (e) schematic description of distribution of RF-sputtered Pt.

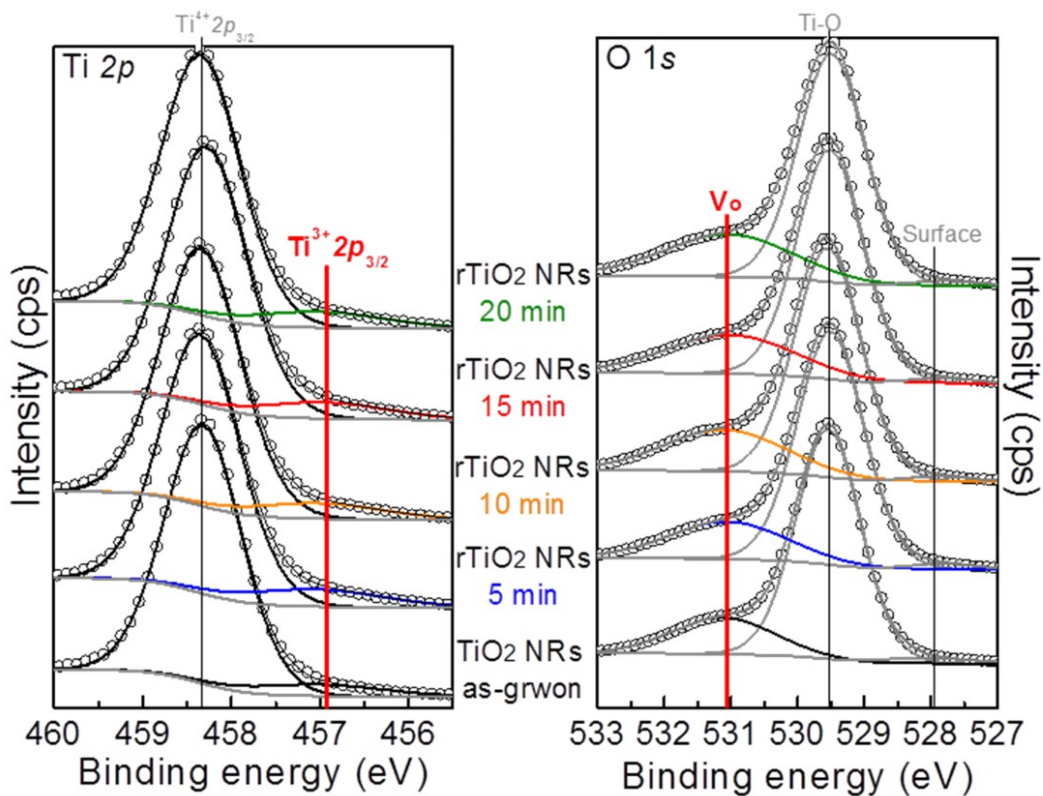

Figure S3. Ti 2p and O 1s XPS spectra of TiO<sub>2</sub> NRs according to electrochemical reduction time.

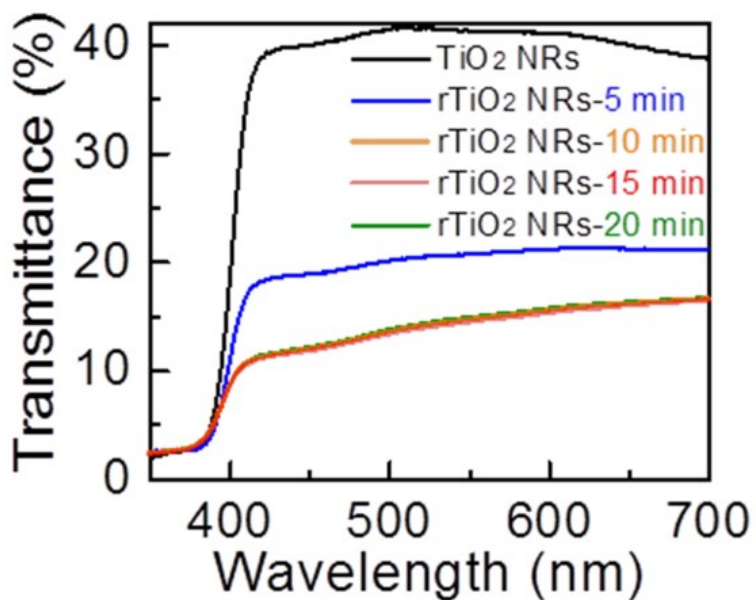

Figure S4. Total diffuse transmittance of TiO<sub>2</sub> NRs and rTiO<sub>2</sub> NRs reduced in different times.

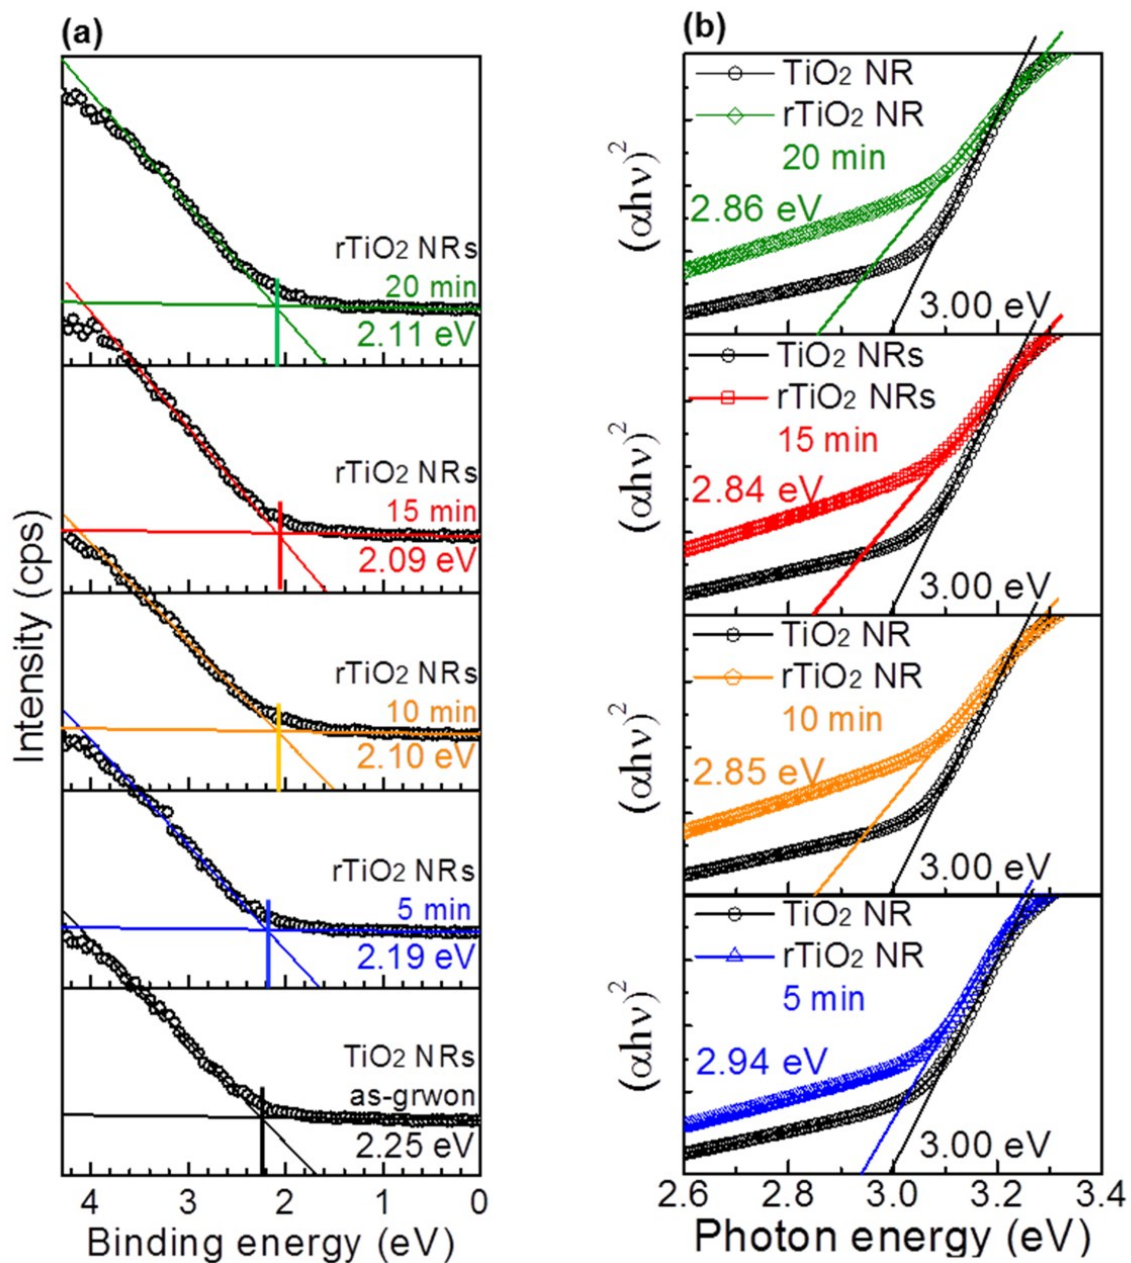

Figure S5. (a) VB positions obtained from VB XPS spectra and (b) plots of Kubelka-Munk function according to the photon energy transformed from total diffuse transmittance.

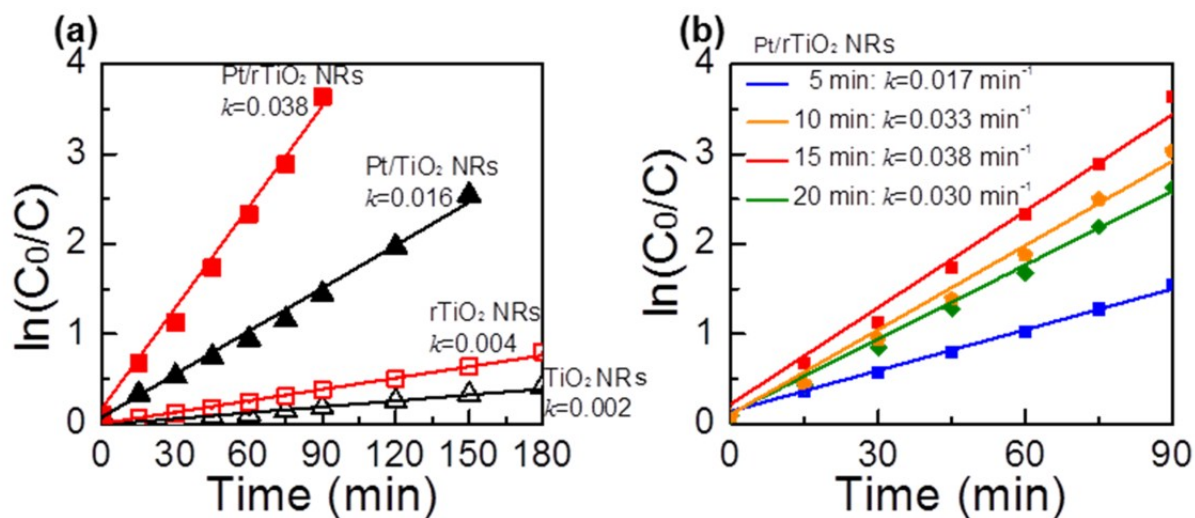

Figure S6. (a) Pseudo-first-order kinetics of TiO<sub>2</sub> NRs, rTiO<sub>2</sub> NRs, Pt/TiO<sub>2</sub> NRs and Pt/rTiO<sub>2</sub> NRs for M.B. photo-degradations. (b) Pseudo-first-order kinetics of Pt/rTiO<sub>2</sub> NRs according to reduction time.
